# Supplementary material
Source: publisher figshare collection journal article supplement (https://acs.figshare.com/ndownloader/files/3927160)
Supplement: Supplementary file 1 [file 3927160]

# Phase identification and structure solution by 3D Electron Diffraction Tomography: Gd-phosphate nanorods

*Arnaud Mayence<sup>1</sup>, Julien R.G. Navarro<sup>1</sup>, Yanhang Ma<sup>1</sup>, Osamu Terasaki<sup>1,2</sup>, Lennart Bergström<sup>1</sup>  
and Peter Oleynikov<sup>1\*</sup>*

<sup>1</sup>Arrhenius Laboratory, Department of Materials and environmental chemistry, Stockholm  
University, Stockholm, Sweden

<sup>2</sup>Graduate School of EEWS, KAIST, Daejeong, Republic of Korea

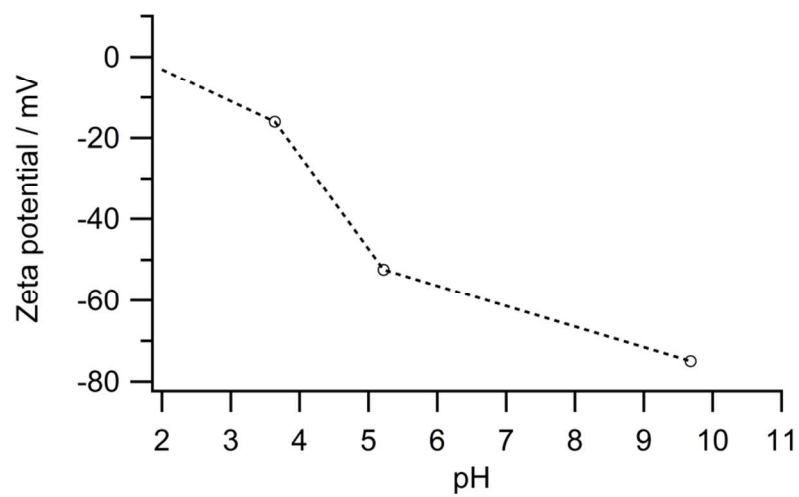

**Figure S1.** Zeta potential of GdPO<sub>4</sub> nanorods dispersed in water at different pH.

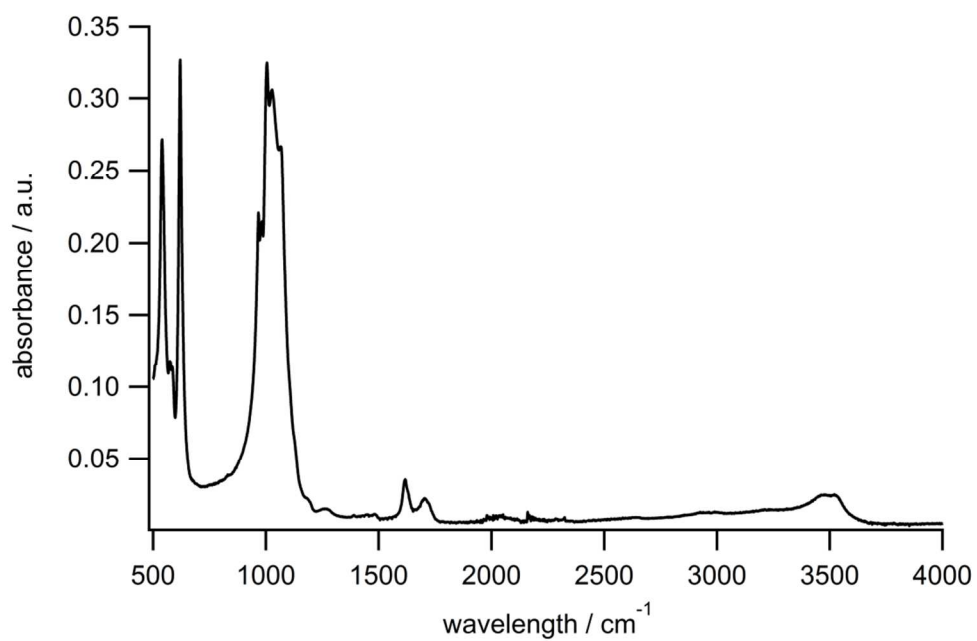

**Figure S2.** IR spectrum of GdPO<sub>4</sub> nanorods powder.
